# Supplementary material for: Synthesis of mesoporous-silica-coated Gd2O3:Eu@silica particles as cell imaging and drug delivery agents
Source: Royal Society of Chemistry journal article supplement (doi:10.1039/c5dt04908c), 2016-01-01
Supplement: c5dt04908c1.pdf [file c5dt04908c1.pdf]

## Electronic Supplementary Information

---

# Synthesis of mesoporous-silica-coated Gd<sub>2</sub>O<sub>3</sub>:Eu@silica particles as cell imaging and drug delivery agents

Weiye Song, Weihua Di\* and Weiping Qin\*

*State Key Laboratory on Integrated Optoelectronics, College of Electronic Science and  
Engineering, Jilin University, Changchun 130012, PR China*

The FT-IR spectrum provides the insight into the chemical composition of the as-prepared sample (Figure S1). A broad absorption band peaking at  $3400\text{ cm}^{-1}$  and a shoulder located at  $1645\text{ cm}^{-1}$  are the characteristic absorption of water of hydration in the structure or surface adsorbed water and hydroxyl groups ( $\text{OH}^-$ ).<sup>1</sup> The presence of carbonate anions in the molecular structure was confirmed by the appearance of absorption doublets in the region  $1350\text{--}1600\text{ cm}^{-1}$  ( $\nu_3$  of  $\text{CO}_3^{2-}$ , peaking at  $\sim 1408$  and  $1504\text{ cm}^{-1}$ ) and also by the occurrence of multiple absorptions ranging from  $500$  to  $1000\text{ cm}^{-1}$  ( $\nu_2$  and  $\nu_4$  of  $\text{CO}_3^{2-}$ ).<sup>2,3</sup> The elemental analysis quantifies the elemental components (mass %) of the as-prepared precursor. Elemental contents of the dried particles analyzed by the inductively coupled plasma (ICP) spectrophotometric method were listed in Table S1, yielding a (Gd+Eu):C:O molar ratio of about 1:1.01:5.10. Assuming that all the carbon was from  $\text{CO}_3^{2-}$  and considering molecular neutrality, the chemical formula of the as-prepared product may be expressed as  $\text{Gd}(\text{OH})\text{CO}_3\cdot\text{H}_2\text{O}$ . The results are consistent with the pioneering work of Matijevic *et al.* and the work by Lechevallier's group.<sup>4</sup>

The thermogravimetric analysis (TGA) curve of the as-prepared sample was shown in Figure S2. The weight loss of  $\text{Gd}(\text{OH})\text{CO}_3\cdot\text{H}_2\text{O}:\text{Eu}$  undergoes a three-step process. The first one ( $25\text{--}170^\circ\text{C}$ ) is due to the desorption of water molecules adsorbed at the particles surface due to the storage in air. The second weight loss ( $170\text{--}550^\circ\text{C}$ ) is related to the removal of water molecules due to the dehydration of hydrated compounds and the self-condensation of hydroxyl groups (O-H). The third one ( $550\text{--}750^\circ\text{C}$ ) originates from the release of  $\text{CO}_2$  molecules.<sup>4</sup>

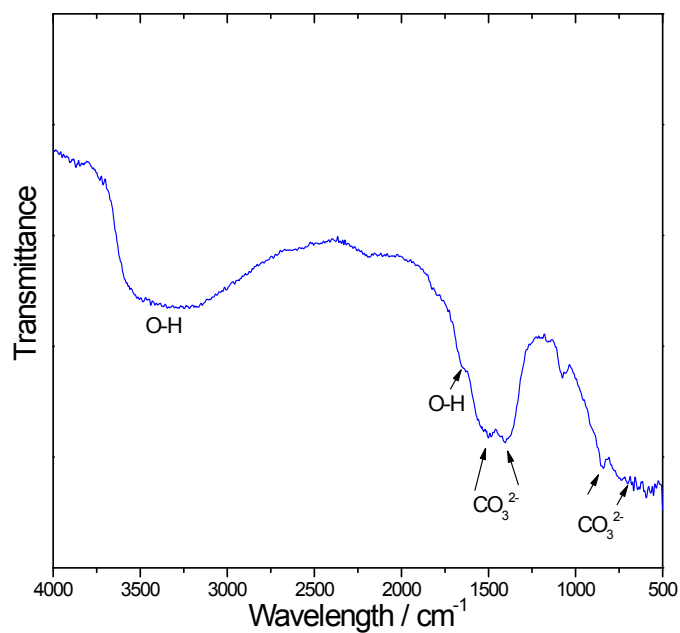

**Figure S1.** FT-IR spectra of the as-prepared  $\text{Gd}(\text{OH})\text{CO}_3 \cdot \text{H}_2\text{O}:\text{Eu}$  (a) and the samples calcinated at  $550\text{ }^\circ\text{C}$  (b) and  $750\text{ }^\circ\text{C}$  (c), respectively.

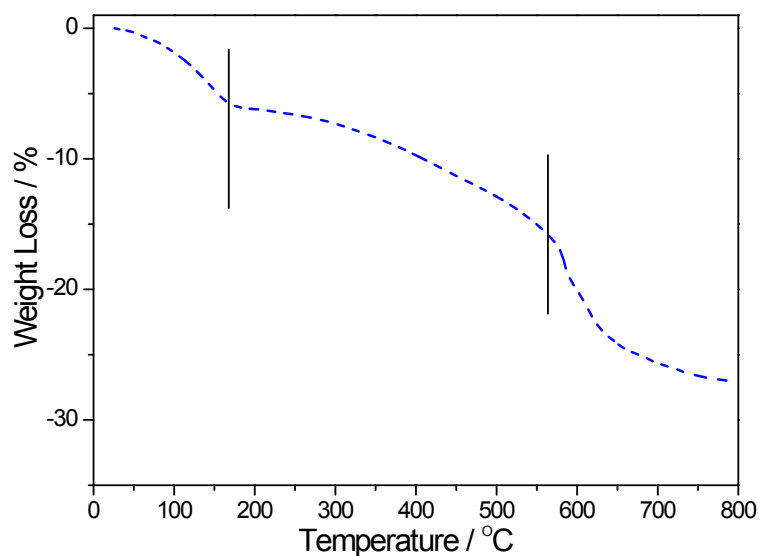

**Figure S2.** Thermogravimetric analysis curve of the precursor  $\text{Gd}(\text{OH})\text{CO}_3 \cdot \text{H}_2\text{O}:\text{Eu}$  measured in air.

**Table S1.** Elemental content of as-prepared particles (mass %).

| Gd    | Eu   | C    | O     |
|-------|------|------|-------|
| 58.2% | 3.7% | 4.8% | 31.6% |

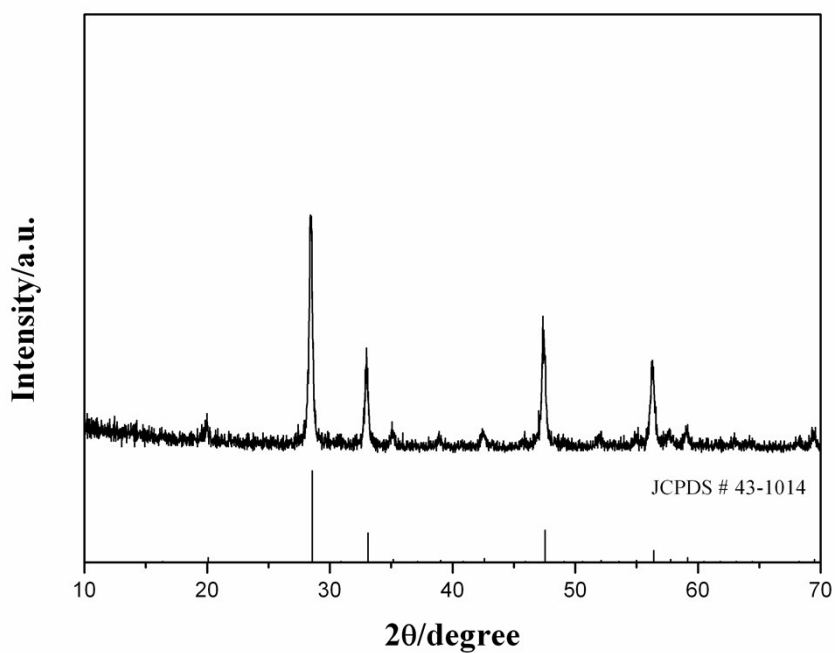

**Figure S3.** XRD pattern of  $\text{Gd}(\text{OH})\text{CO}_3 \cdot \text{H}_2\text{O}:\text{Eu}$  after calcination at 750 °C. Upon calcination, the amorphous  $\text{Gd}(\text{OH})\text{CO}_3 \cdot \text{H}_2\text{O}$  is converted into cubic phase gadolinium oxides ( $\text{Gd}_2\text{O}_3$ ).

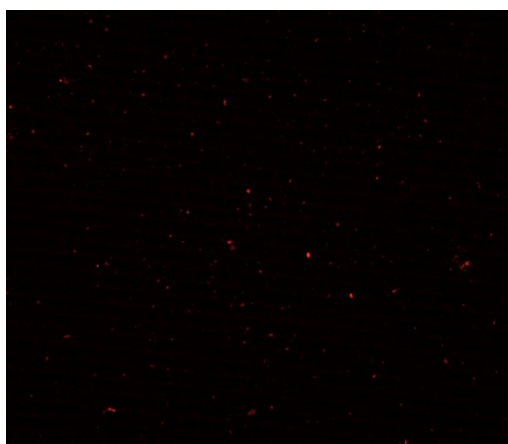

**Figure S4.** Confocal fluorescence microscopy image of Mesoporous-silica-coated  $\text{Gd}_2\text{O}_3:\text{Eu}@\text{silica}$  particles first dispersed in ethanol and then smeared on a glass slide.

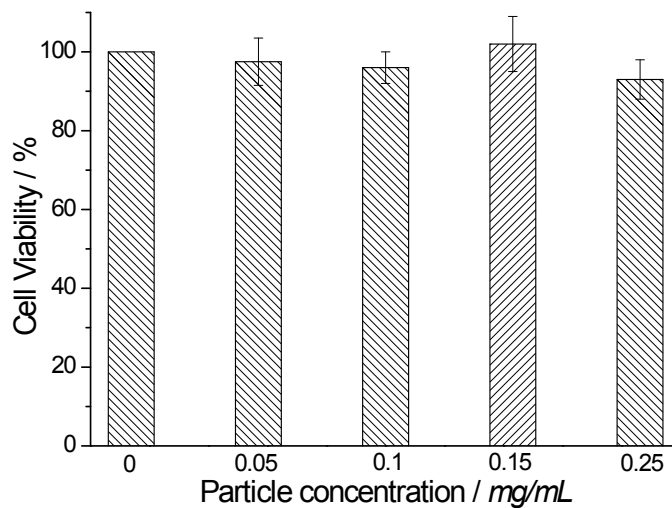

**Figure S5.** Concentration effect of the core-shell particles on cell viability via incubation for 72 h.

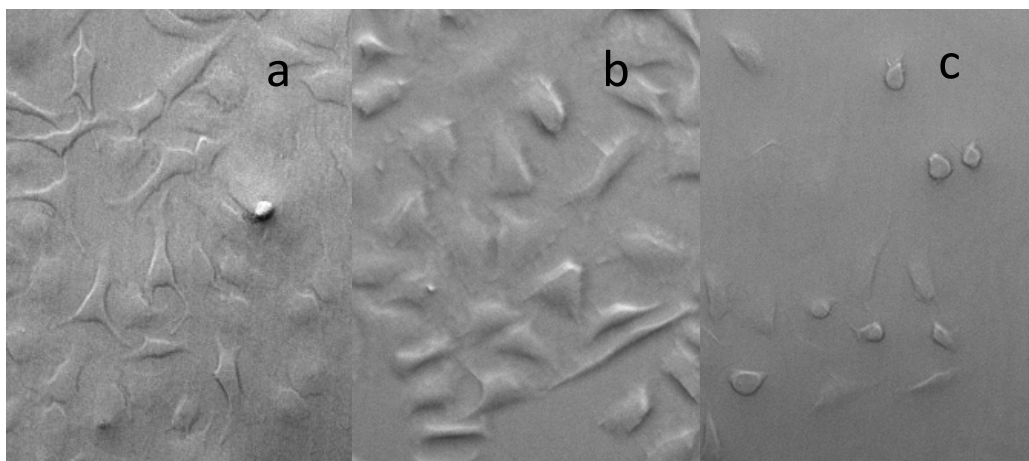

**Figure S6.** The morphology of the HeLa cells incubated with the DOX-loaded mesoporous particles as a function of incubation time. a) 0 h; b) 24 h; c) 72 h

## References

1. L. Moscardini d'Assuncao, I. Giolito and M. Ionashiro, *Thermochim. Acta* 1989, **137**, 319.
2. W. Matijevic and W. Hsu, *J. Colloid. Interface Sci.* 1987, **118**, 506.
3. K. Makamoto, *Infrared spectra of inorganic and coordination compounds*. New York: John Wiley & Sons; 1963.
4. S. Lechevallier, P. Lecante, R. Mauricot, H. Dexpert, J. Dexpert-Ghys, H. K. Kong, G. L. Law and K. L. Wong, *Chem. Mater.* 2010, **22**, 6153.
